# Supplementary material for: Moringa oleifera leaves extract-mediated synthesis of ZnO nanostructures for the enhanced photocatalytic oxidation of erythrosine
Source: Royal Society of Chemistry journal article supplement (doi:10.1039/d4ra08782h), 2025-01-01
Supplement: d4ra08782h1.pdf [file d4ra08782h1.pdf]

**Moringa oleifera leave extract mediated synthesis of ZnO nanostructures for the enhanced photocatalytic oxidation of erythrosine.**

Noshaba Parven<sup>1</sup>, Khalida Faryal Almani<sup>1</sup>, Muhammad Ali Bhatti<sup>2</sup>, Aneela Tahira<sup>4</sup>, Omm-e-Hany<sup>4</sup>, Aqeel Ahmed Shah<sup>6</sup>, Ayman Nafady<sup>7</sup>, Matteo Tonezzer<sup>8</sup>, Zafar Hussain Ibupoto<sup>3\*</sup>

<sup>1</sup>*Departement of Pharmaceuticals, University of Sindh, Jamshoro 76080, Pakistan.*

<sup>2</sup>*Centre for Environmental Sciences, University of Sindh Jamshoro, 76080, Sindh, Pakistan.*

<sup>3</sup>*Institute of Chemistry, University of Sindh, Jamshoro 76080, Pakistan.*

<sup>4</sup>*Institute of Chemistry, Shah Abdul Latif University KhairpurMirs, Sindh, Pakistan.*

<sup>5</sup>*Department of Environmental Studies, University of Karachi, 75270, Sindh, Pakistan.*

<sup>6</sup>*Wet Chemistry Laboratory, Department of Metallurgical Engineering, NED University of Engineering and Technology, University Road, Karachi 75270, Pakistan.*

<sup>7</sup>*Chemistry Department, College of Science, King Saud University, Riyadh, 11451, Saudi Arabia.*

<sup>8</sup>*Department of Chemical and Geological Sciences, University of Cagliari, Monserrato, Italy.*

*\*Corresponding author(s): Zafar Hussain Ibupoto, PhD, Email :[zaffar.ibhupoto@usindh.edu.pk](mailto:zaffar.ibhupoto@usindh.edu.pk)*

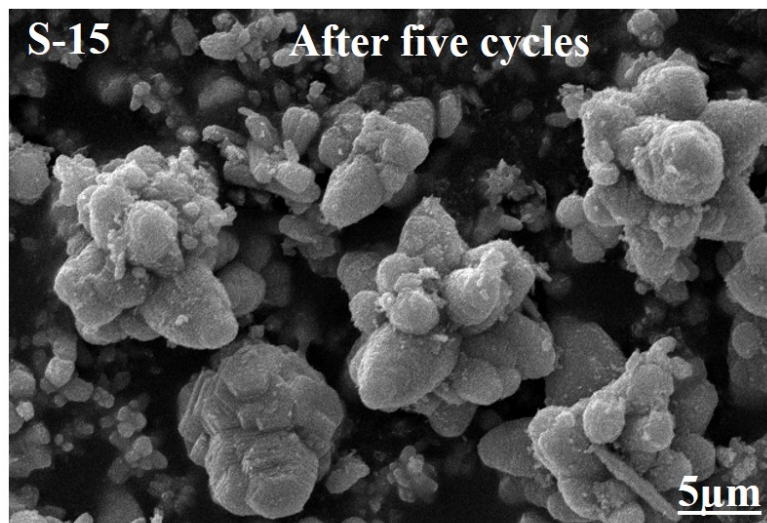

**Figure (S1):** SEM image of S-15 after cycling stability test

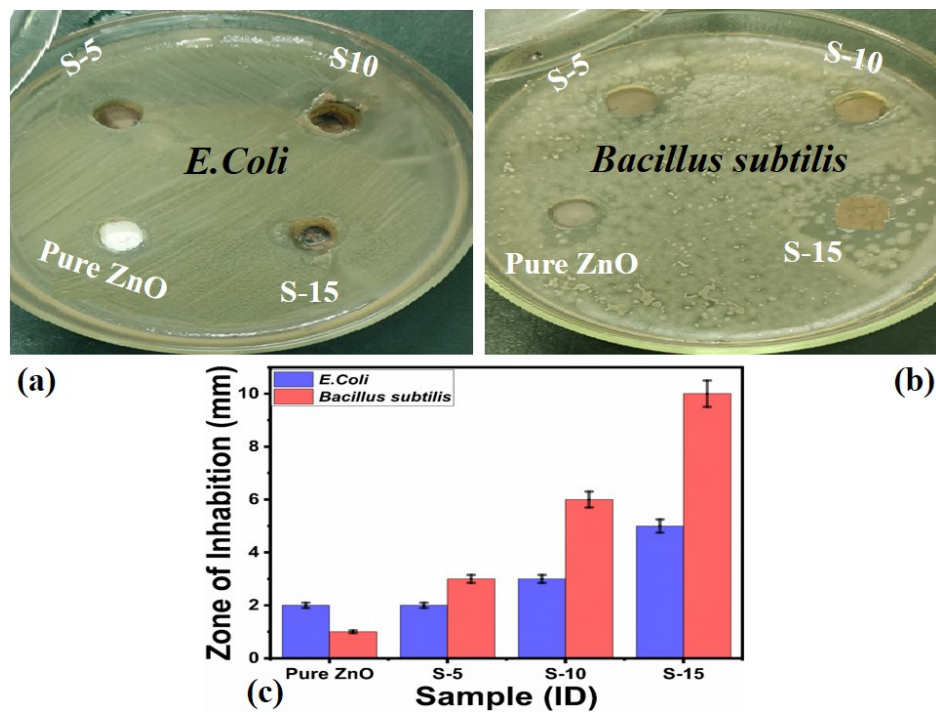

**Figure (S2):** (a, b) Antibacterial activity of pure ZnO and ZnO nanostructures synthesized with 5mL (S-5), 10mL(S-10) and 15 mL(S-15) of *Moringa oleifera* leaves extract respectively in E.Coli and their petri dish view with inhibition zone, (c) Corresponding measured inhibition zone in mm.

**Table (S1):** Comparative analysis of green assisted ZnO nanoparticles using sample 3 with pervious reported work

| Photocatalyst            | Light source             | Time (min) | Catalyst dose | Degradation (%) | Ref.   |
|--------------------------|--------------------------|------------|---------------|-----------------|--------|
| ZnO NPs                  | UV-lamp                  | 100        | 15 mg         | 99.8            | Herein |
| ZnO                      | Hg-lamp 10 W             | 120        | 100 mg        | 90.0            | 63     |
| Mn-ZnO                   | UV Lamp                  | 90         | 24 mg         | 60.0            | 64     |
| ZnO/AC                   | UV-lamp                  | 45         | 0.25 g/L      | 92.2            | 65     |
| Ag-ZnO                   | Solar radiation          | 30         | 100 mg        | 98.5            | 66     |
| Ag-ZnO@GO                | Xe-lamp 20 W             | 180        | 20 mg         | 85.0            | 67     |
| ZnO/CuO                  | Solar radiation          | 120        | 0.5 g/L       | 93.0            | 68     |
| ZnO/PNA                  | UV-lamp 250 W            | 120        | 200 mg        | 85.0            | 69     |
| Cd-ZnS                   | Solar radiation          | 120        | 30 mg         | 96.7            | 70     |
| CuO/ZnO/TiO <sub>2</sub> | UV-light 6 W             | 180        | 100 mg        | 100             | 71     |
| ZnO/GO                   | Xe-lamp 300 W            | 90         | 10 µg/mL      | 95.6            | 72     |
| ZnO SCs                  | LED lamp 23 W            | 780        | 0.1 g         | 58.0            | 73     |
| 30%ZnO/Nylon             | UV-light 15 w            | 300        | 0.01 g        | 58.3            | 74     |
| CNDE2.0                  | A350 W <u>xenon</u> lamp | 120        | 50 mg         | 90%             | 75     |

| <b>Photocatalyst</b> | <b>Light source</b> | <b>Time<br/>(min)</b> | <b>Catalyst<br/>dose</b> | <b>Degradation<br/>(%)</b> | <b>Ref.</b>   |
|----------------------|---------------------|-----------------------|--------------------------|----------------------------|---------------|
| <b>Sample-3</b>      | <b>Sun light</b>    | <b>90</b>             | <b>15mg</b>              | <b>98</b>                  | <b>Herein</b> |
